# Supplementary material
Source: publisher site journal article supplement (https://www.dovepress.com/article/383324)
Supplement: Supplementary file 1 [file get_supplementary_file.php]

**Supplementary Information for**

**Greater Plasma Protein Adsorption on Mesoporous Silica Nanoparticles Aggravates Atopic Dermatitis**

Jin Kyeong Choi1,†, Jun-Young Park2,†, Soyoung Lee3, Young-Ae Choi4, Song Kwon2, Min Jun Shin2,5, Hui-Suk Yun6, Yong Hyun Jang7, Jinjoo Kang4, Namkyung Kim4, Dongwoo Khang2,5,8,*, Sang-Hyun Kim4,*

*1Department of Immunology, Jeonbuk National University Medical School, Jeonju 54896, Republic of Korea*

*2Lee Gil Ya Cancer and Diabetes Institute, Gachon University, Incheon 21999, Republic of Korea*

*3Immunoregulatory Materials Research Center, Korea Research Institute of Bioscience and Biotechnology, Jeongeup 56212, Republic of Korea*

*4CMRI, Department of Pharmacology, School of Medicine, Kyungpook National University, Daegu 41944, Republic of Korea*

*5Department of Health Sciences and Technology, GAIHST, Gachon University, Incheon 21999, Korea*

*6Powder & Ceramics Division, Korea Institute of Materials Science, Changwon 51508, Republic of Korea*

*7Department of Dermatology, School of Medicine, Kyungpook National University, Daegu 41944, Republic of Korea*

*8Department of Physiology, School of Medicine, Gachon University, Incheon 21999, Republic of Korea*

†Equally contributed

*Corresponding author:

Prof. Dongwoo Khang, Department of Physiology, College of Medicine, Gachon University, Incheon 21999, Republic of Korea, Tel: +82 32 899 6515, E-mail: dkhang@gachon.ac.kr

Prof. Sang-Hyun Kim, Department of Pharmacology, School of Medicine, Kyungpook National University, Daegu 41944, Republic of Korea, Tel: +82 53 420 4838, E-mail: [shkim72@knu.ac.kr](mailto:shkim72@knu.ac.kr)

**Table S1** Specific surface characteristics (surface area, pore volume, and pore size) values of CSN and MSN analyzed by BET analysis**.**

| Sample name | Test Items | Unit | Result |
| --- | --- | --- | --- |
| CSN | **Surface Area**  BET surface area | m2/g | 44.6530 |
| **Pore volume**  Single point adsorption total pore volume of pores  (*PP/PP*0 = 0.994296090) | cm3/g | 0.295409 |
| **Pore Size**  Adsorption average pore diameter (*4V/A by BET*) | Å | 264.627 |

| Sample name | Test Items | Unit | Result |
| --- | --- | --- | --- |
| MSN | **Surface Area**  BET surface area | m2/g | 884.5656 |
| **Pore volume**  Single point adsorption total pore volume of pores  (*PP/PP*0 = 0.994296090) | cm3/g | 1.094537 |
| **Pore Size**  Adsorption average pore diameter (*4V/A by BET*) | Å | 49.495 |


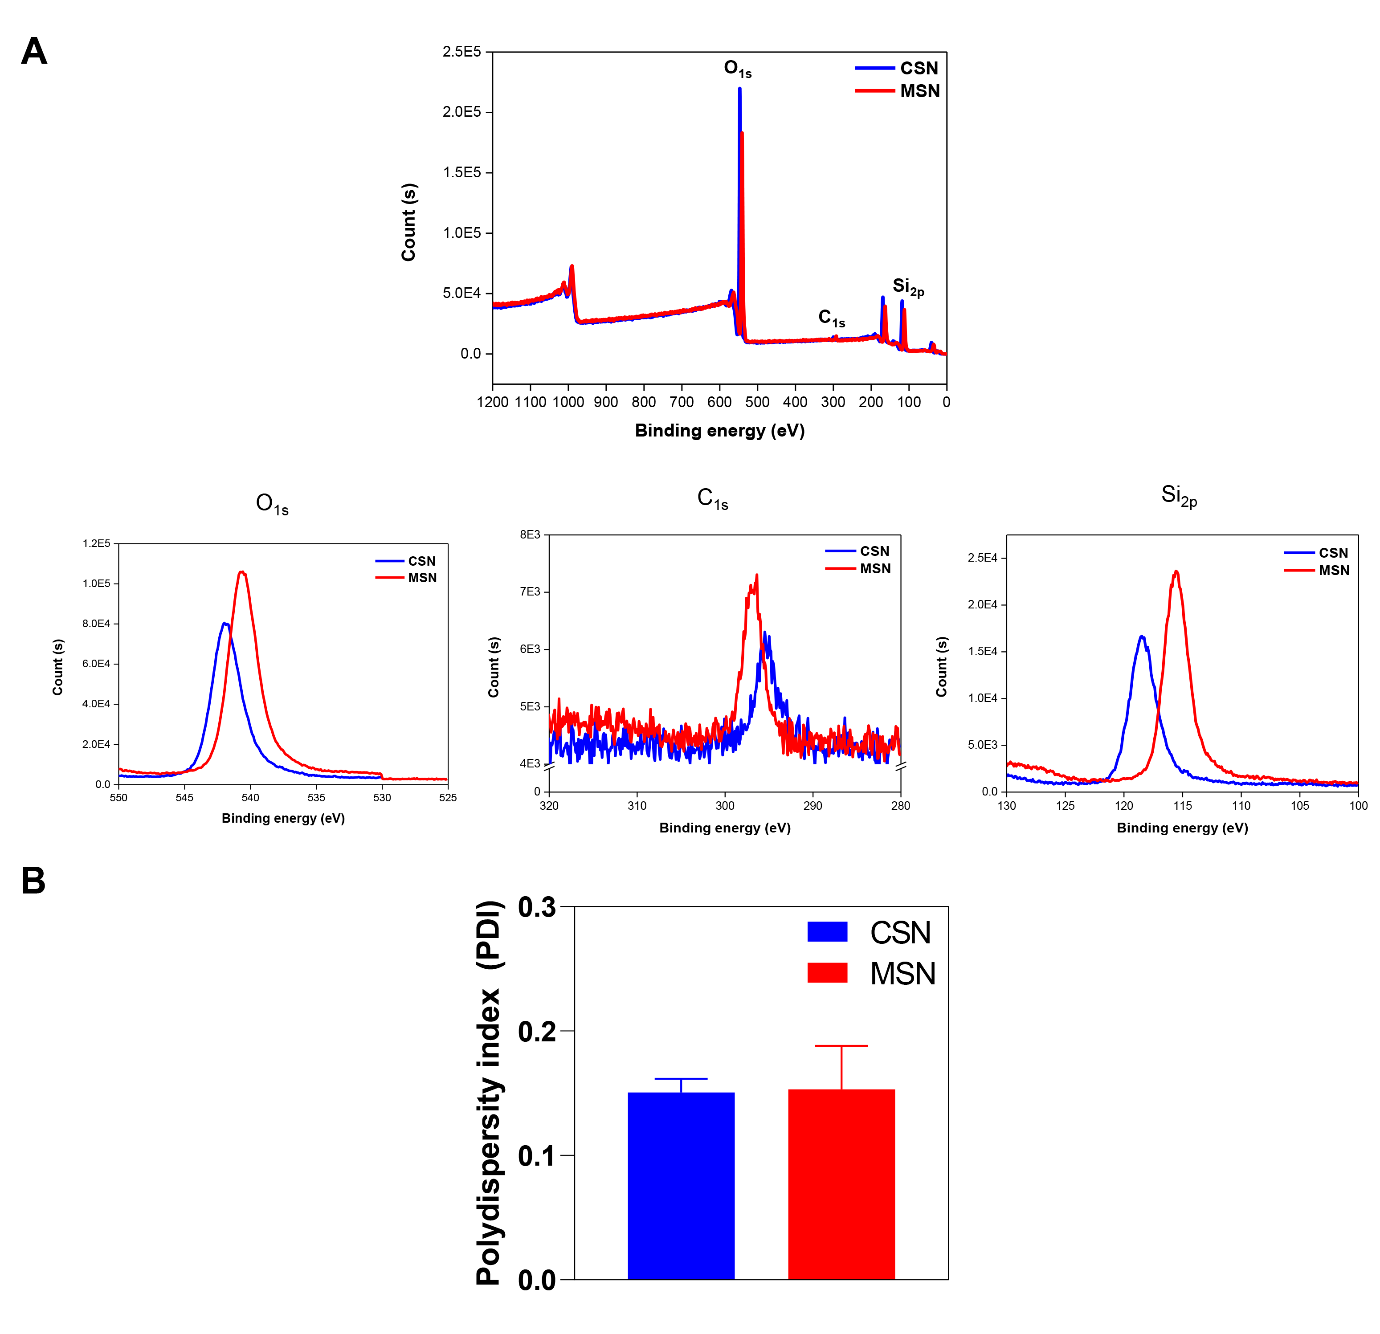


**Figure S1** Polydispersity index and XPS.(A) XPS full spectra of CSN and MSN. XPS analysis indicated that oxygen and silica show identical atomic weight, which shows that there are no surface chemical changes between CSN and MSN. A slight shift in the XPS spectrum induced by different conductivities between samples (CSN and MSN) is observed. (B) Polydispersity indexes of CSN and MSN indicate identical solubility after 6 h.


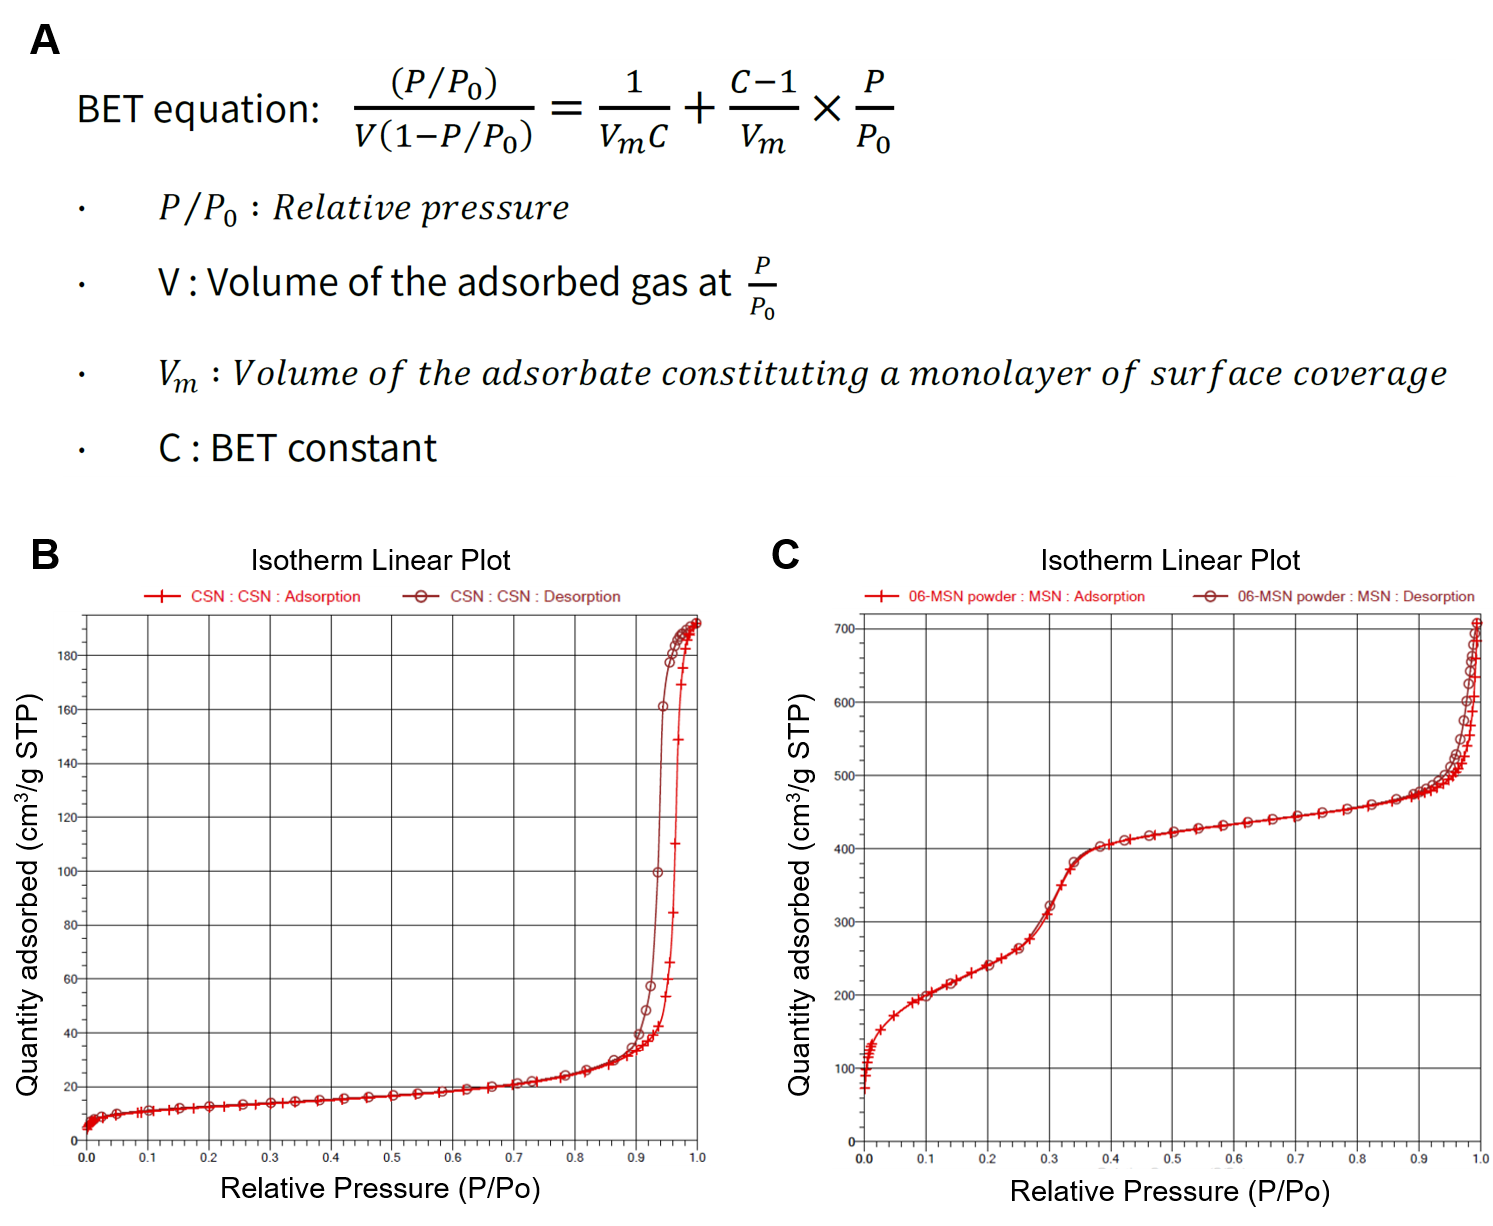


**Figure S2** (A) Brunauer-Emmett-Teller (BET) equations for accurate specific surface area evaluation and calculation. N2 adsorption and desorption isotherms, and pore size distributions of (B) CSN and (C) MSN.


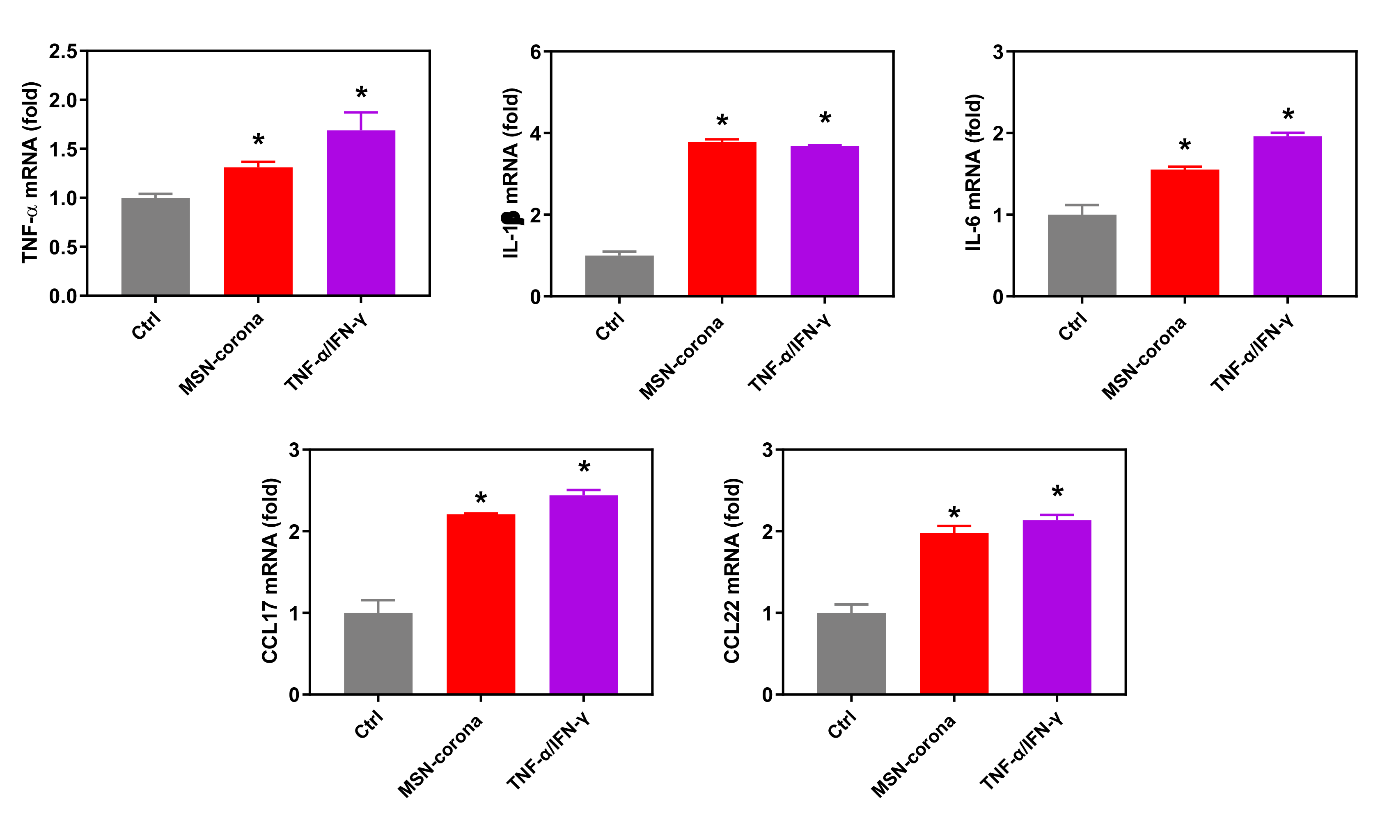


**Figure S3** MSN-corona induce key AD inflammatory mediators as a response to keratinocytes.Expression of cytokines and chemokines in HaCaT cells. Cells were treated with MSN-corona for 6 h. Expression levels of cytokines and chemokines were determined using qPCR. TNF-α and IFN-γ were used as positive controls. The data are presented as the mean ± SD. **P* < 0.05, ***P* < 0.01 compared with the control. MSN: mesoporous silica nanoparticles.
